# Supplementary material for: New Formulation–Microporation Combination Approaches to Delivering Ciclopirox across Human Nails
Source: MDPI journal article supplement (doi:10.3390/pharmaceutics16010072), 2024-01-04
Supplement: s1 [file s1]

## Supplementary material

### New formulation-microporation combined approaches to deliver ciclopirox across human nail.

Juliana Kishishita<sup>1</sup>, Camila de Almeida Perez Pimenta<sup>1</sup>, Danielle Patricia Cerqueira Macêdo<sup>2</sup>, M. Begoña Delgado-Charro<sup>3,\*</sup> and Leila Bastos Leal<sup>1</sup>

#### S1. In vitro release test (IVRT) results

##### 1.a Preliminary IVRT: Membrane selection:

Figures S1 show CPO release from a gel (GH1), a thermogel (GP1) formulation and from Micolamina®, all containing 8% of drug, and across 3 different artificial membranes for 4 hours.

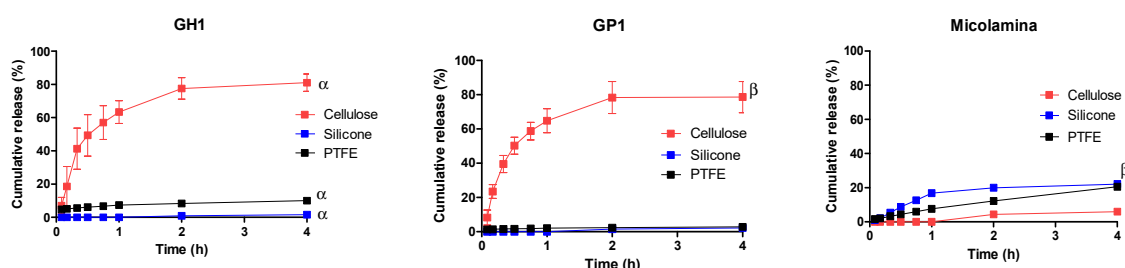

**Figure S1** – CPO cumulative *in vitro* percentual release (mean  $\pm$  SD, n=6) from GH1, GP1 and Micolamina® across cellulose, silicone and PTFE membranes. Results from one-way ANOVAs followed by Bonferroni's multiple comparison tests:  $\alpha$ : significantly ( $p < 0.05$ ) different percentage released across the three different membranes,  $\beta$ : significantly ( $p < 0.05$ ) different percentage released across cellulose and the other two membranes, but no differences found between silicone and PTFE membranes.

##### 1.b IVRT results corresponding to the second series of gel products (Table 3) based on GH6 formulae.

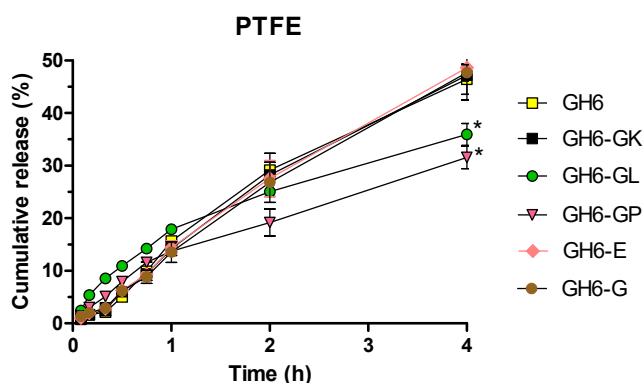

**Figure S2** - CPO cumulative amount (mean  $\pm$  SD, n=6) released from gels GH6, GH6-GK, GH6-GL, GH6-GP, GH6-E and GH6-G across PTFE membranes. GH6-GP and GH6GP (\*) donors provided a significantly ( $p < 0.05$ ) smaller percentage released compared to all other gels but no differences were found between these two (one-way ANOVAs followed by Bonferroni's multiple comparison tests).

## S2. Additional formulation properties and drug stability.

Table S1 shows the organoleptic characteristics, pH and CPO content (mean  $\pm$  SD) for the formulations. CPO content was determined immediately after preparation, and after 6 months storage at room temperature, and in all cases, the CPO loading was within the limit specified for topical formulations (90-110%).

Table S1 - Organoleptic characteristics, pH and CPO content (mean  $\pm$  SD) of the formulations. \* pH terminated using pH indicator paper (MQuant®-Merck).

| Formulations  | Consistency             | Colour             | Odor                | pH              | CPO content (%)    | CPO content (%)   |
|---------------|-------------------------|--------------------|---------------------|-----------------|--------------------|-------------------|
|               |                         |                    |                     |                 | T 0                | T 6 months        |
| <b>GH1</b>    | Liquid                  | Colorless          | Isopropanol residue | 12.5 $\pm$ 0.02 | 98.37 $\pm$ 0.07   | 97.11 $\pm$ 0.2   |
| <b>GH2</b>    | Liquid                  | Slightly yellowish | Isopropanol residue | 12.4 $\pm$ 0.03 | 108.18 $\pm$ 0.025 | 99.23 $\pm$ 0.13  |
| <b>GH3</b>    | Liquid                  | Slightly yellowish | Isopropanol residue | 12.7 $\pm$ 0.04 | 100.37 $\pm$ 0.027 | 96.73 $\pm$ 0.12  |
| <b>GH4</b>    | Liquid                  | Colorless          | Isopropanol residue | 10.8 $\pm$ 0.01 | 104.83 $\pm$ 0.02  | 99.45 $\pm$ 0.18  |
| <b>GH5</b>    | Liquid                  | Colorless          | Isopropanol residue | 12.3 $\pm$ 0.07 | 106.1 $\pm$ 0.015  | 96.66 $\pm$ 0.92  |
| <b>GH6</b>    | Liquid                  | Slightly yellowish | Isopropanol residue | 12.1 $\pm$ 0.05 | 101.36 $\pm$ 0.036 | 95.99 $\pm$ 0.12  |
| <b>GH6-E</b>  | Liquid                  | Colorless          | Isopropanol residue | 10.6 $\pm$ 0.01 | 100.65 $\pm$ 0.078 | 98.02 $\pm$ 0.18  |
| <b>GH6-G</b>  | Liquid                  | Colorless          | Isopropanol residue | 10.9 $\pm$ 0.02 | 102.10 $\pm$ 0.068 | 99.82 $\pm$ 0.14  |
| <b>GH6-GK</b> | Liquid                  | Colorless          | Isopropanol residue | 12.5 $\pm$ 0.03 | 99.75 $\pm$ 0.087  | 95.10 $\pm$ 0.15  |
| <b>GH6-GL</b> | Liquid                  | Colorless          | Isopropanol residue | 12.8 $\pm$ 0.01 | 99.95 $\pm$ 0.058  | 98.77 $\pm$ 0.24  |
| <b>GH6-GP</b> | Liquid                  | Colorless          | Isopropanol residue | 12.3 $\pm$ 0.02 | 102.02 $\pm$ 0.074 | 97.15 $\pm$ 0.27  |
| <b>GP1</b>    | Slightly viscous liquid | Colorless          | Isopropanol residue | 11.1 $\pm$ 0.01 | 103.45 $\pm$ 0.11  | 101.19 $\pm$ 0.12 |

|                   |                         |                    |                         |                 |                    |                   |
|-------------------|-------------------------|--------------------|-------------------------|-----------------|--------------------|-------------------|
| <b>GP2</b>        | Slightly viscous liquid | Slightly yellowish | Isopropanol residue     | $10.8 \pm 0.05$ | $109.5 \pm 0.17$   | $96.84 \pm 0.17$  |
| <b>GP3</b>        | Slightly viscous liquid | Slightly yellowish | Isopropanol residue     | $12.3 \pm 0.02$ | $107.88 \pm 0.035$ | $104.00 \pm 0.92$ |
| <b>GP4</b>        | Slightly viscous liquid | Slightly yellowish | Isopropanol residue     | $10.5 \pm 0.01$ | $99.97 \pm 0.33$   | $96.02 \pm 0.02$  |
| <b>GP5</b>        | Slightly viscous liquid | Slightly yellowish | Isopropanol residue     | $12.9 \pm 0.01$ | $100.01 \pm 0.04$  | $95.00 \pm 0.16$  |
| <b>MICOLAMINA</b> | Liquid                  | Slightly yellowish | Organic solvent residue | 5*              | $107.3 \pm 0.04$   | $98.34 \pm 0.24$  |

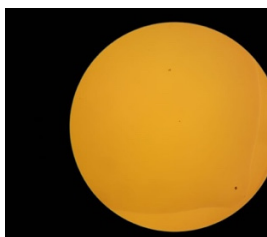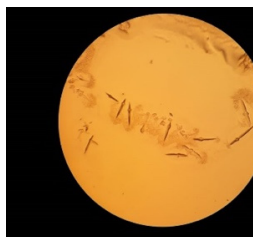

Top panel: Example of thermogel formulation without crystals (left panel) and with crystals (right panel)

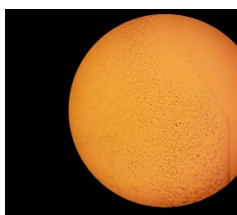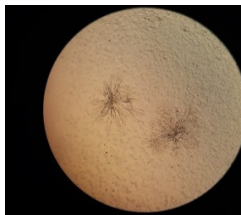

Bottom panel: Example of thermogel formulation without crystals (left panel) and with crystals (right panel)

**Figure S3** - Absence of crystals was made by placing 2 drops of each formulation on a slide, covered with a coverslip and then observed through an optical microscope.

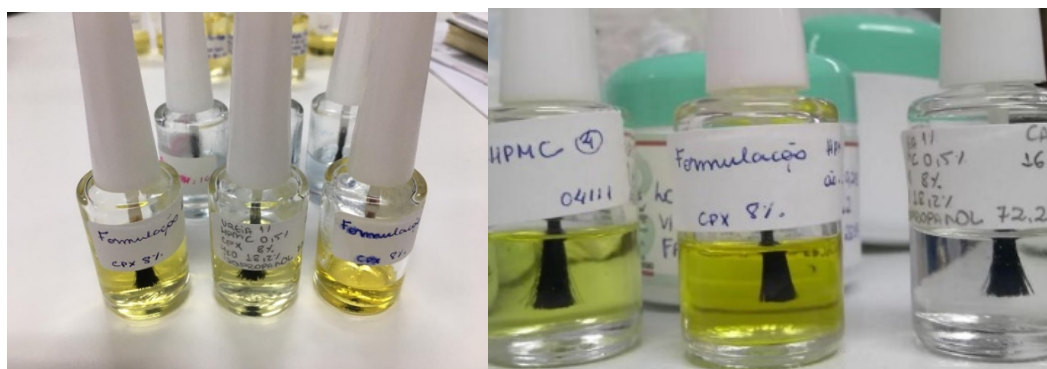

**Figure S4** – CPO formulations present the typical yellow colour (left panel) which may intensify 2-3 hour after preparation (right panel).
